# Supplementary material for: Cyclic Bis-1,3-dialkylpyridiniums from the Sponge Haliclona sp
Source: Mar Drugs. 2012 Sep 24;10(9):2126–37. doi: 10.3390/md10092126 (PMC3475278; doi:10.3390/md10092126)
Supplement: Supplementary File 1: — PDF-Document (PDF, 746 KB) [file marinedrugs-10-02126-s001.pdf]

## Supplementary Information

**Figure S1.** The  $^1\text{H}$  NMR (500 MHz,  $\text{MeOH-}d_4$ ) spectrum of Compound **3**.

**Figure S2.** The  $^{13}\text{C}$  NMR (150 MHz,  $\text{MeOH-}d_4$ ) spectrum of Compound **3**.

**Figure S3.** The  $^1\text{H}$  NMR (500 MHz,  $\text{MeOH-}d_4$ ) spectrum of Compound **4**.

**Figure S4.** The  $^{13}\text{C}$  NMR (125 MHz,  $\text{MeOH-}d_4$ ) spectrum of Compound **4**.

**Figure S5.** The  $^1\text{H}$  NMR (500 MHz,  $\text{MeOH-}d_4$ ) spectrum of Compound **5**.

**Figure S6.** The  $^{13}\text{C}$  NMR (125 MHz,  $\text{MeOH-}d_4$ ) spectrum of Compound **5**.

**Figure S7.** The  $^1\text{H}$  NMR (500 MHz,  $\text{MeOH-}d_4$ ) spectrum of Compound **6**.

**Figure S8.** The  $^{13}\text{C}$  NMR (125 MHz,  $\text{MeOH-}d_4$ ) spectrum of Compound **6**.

**Figure S9.** The  $^1\text{H}$  NMR (500 MHz,  $\text{MeOH-}d_4$ ) spectrum of Compound **7**.

**Figure S10.** The  $^{13}\text{C}$  NMR (125 MHz,  $\text{MeOH-}d_4$ ) spectrum of Compound **7**.

**Figure S11.** The  $^1\text{H}$  NMR (500 MHz,  $\text{MeOH-}d_4$ ) spectrum of Compound **8**.

**Figure S12.** The  $^{13}\text{C}$  NMR (125 MHz,  $\text{MeOH-}d_4$ ) spectrum of Compound **8**.

**Figure S13.** The  $^1\text{H}$  NMR (500 MHz,  $\text{MeOH-}d_4$ ) spectrum of Compound **9**.

**Figure S14.** The  $^{13}\text{C}$  NMR (125 MHz,  $\text{MeOH-}d_4$ ) spectrum of Compound **9**.

**Figure S15.** The  $^1\text{H}$  NMR (500 MHz,  $\text{MeOH-}d_4$ ) spectrum of Compound **10**.

**Figure S16.** The  $^{13}\text{C}$  NMR (125 MHz,  $\text{MeOH-}d_4$ ) spectrum of Compound **10**.

**Figure S17.** The cytotoxicity test results.

**Figure S1.** The  $^1\text{H}$  NMR (600 MHz,  $\text{MeOH-}d_4$ ) spectrum of Compound **3**.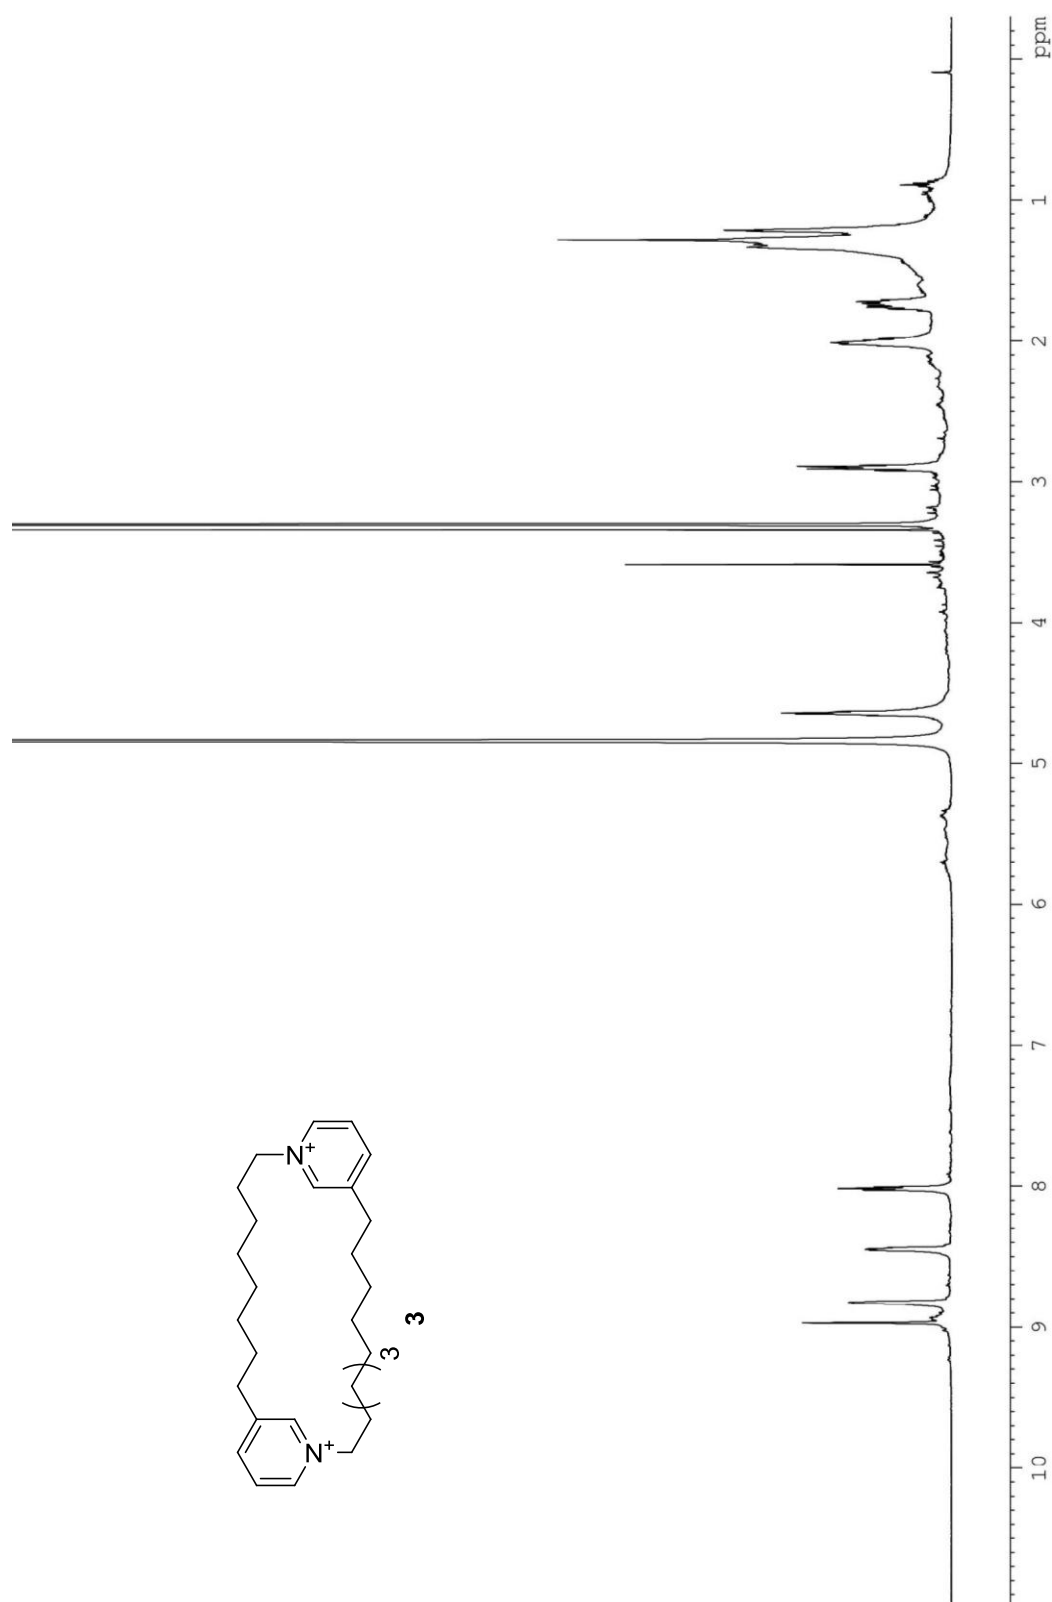

**Figure S2.** The  $^{13}\text{C}$  NMR (150 MHz,  $\text{MeOH-}d_4$ ) spectrum of Compound 3.

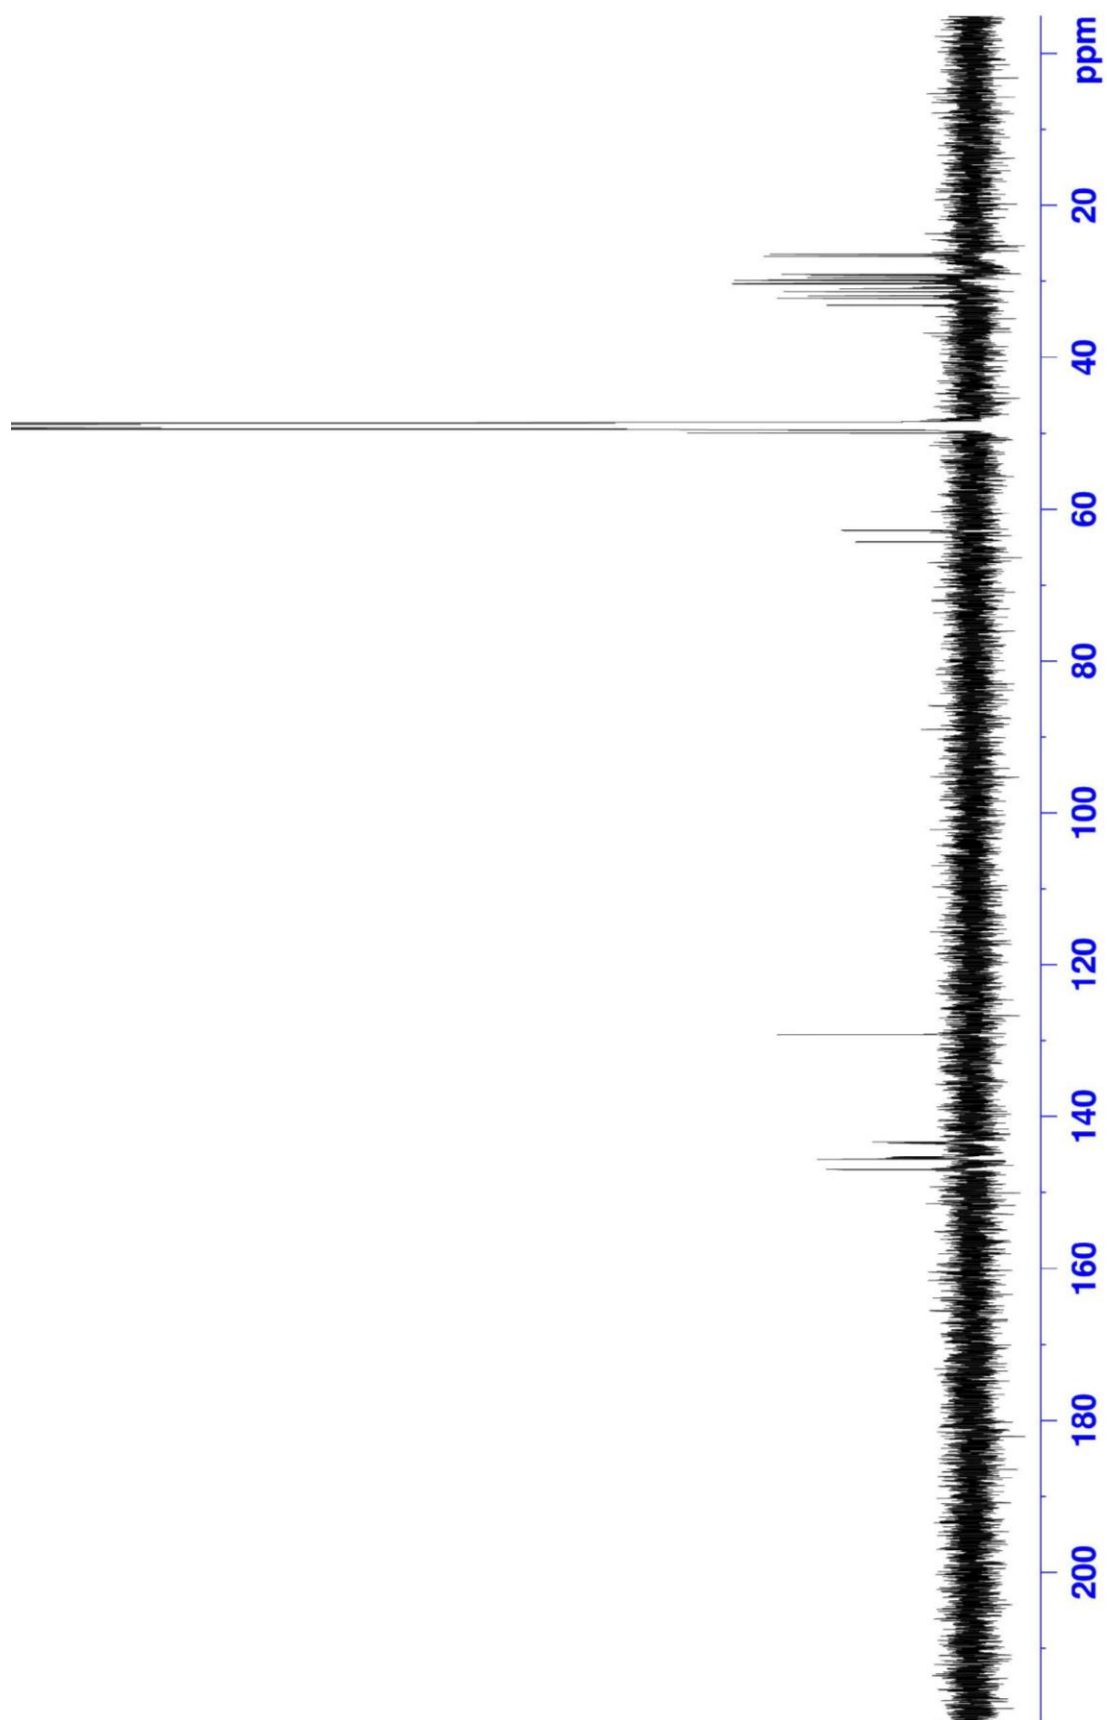

**Figure S3.** The  $^1\text{H}$  NMR (500 MHz,  $\text{MeOH-}d_4$ ) spectrum of Compound 4.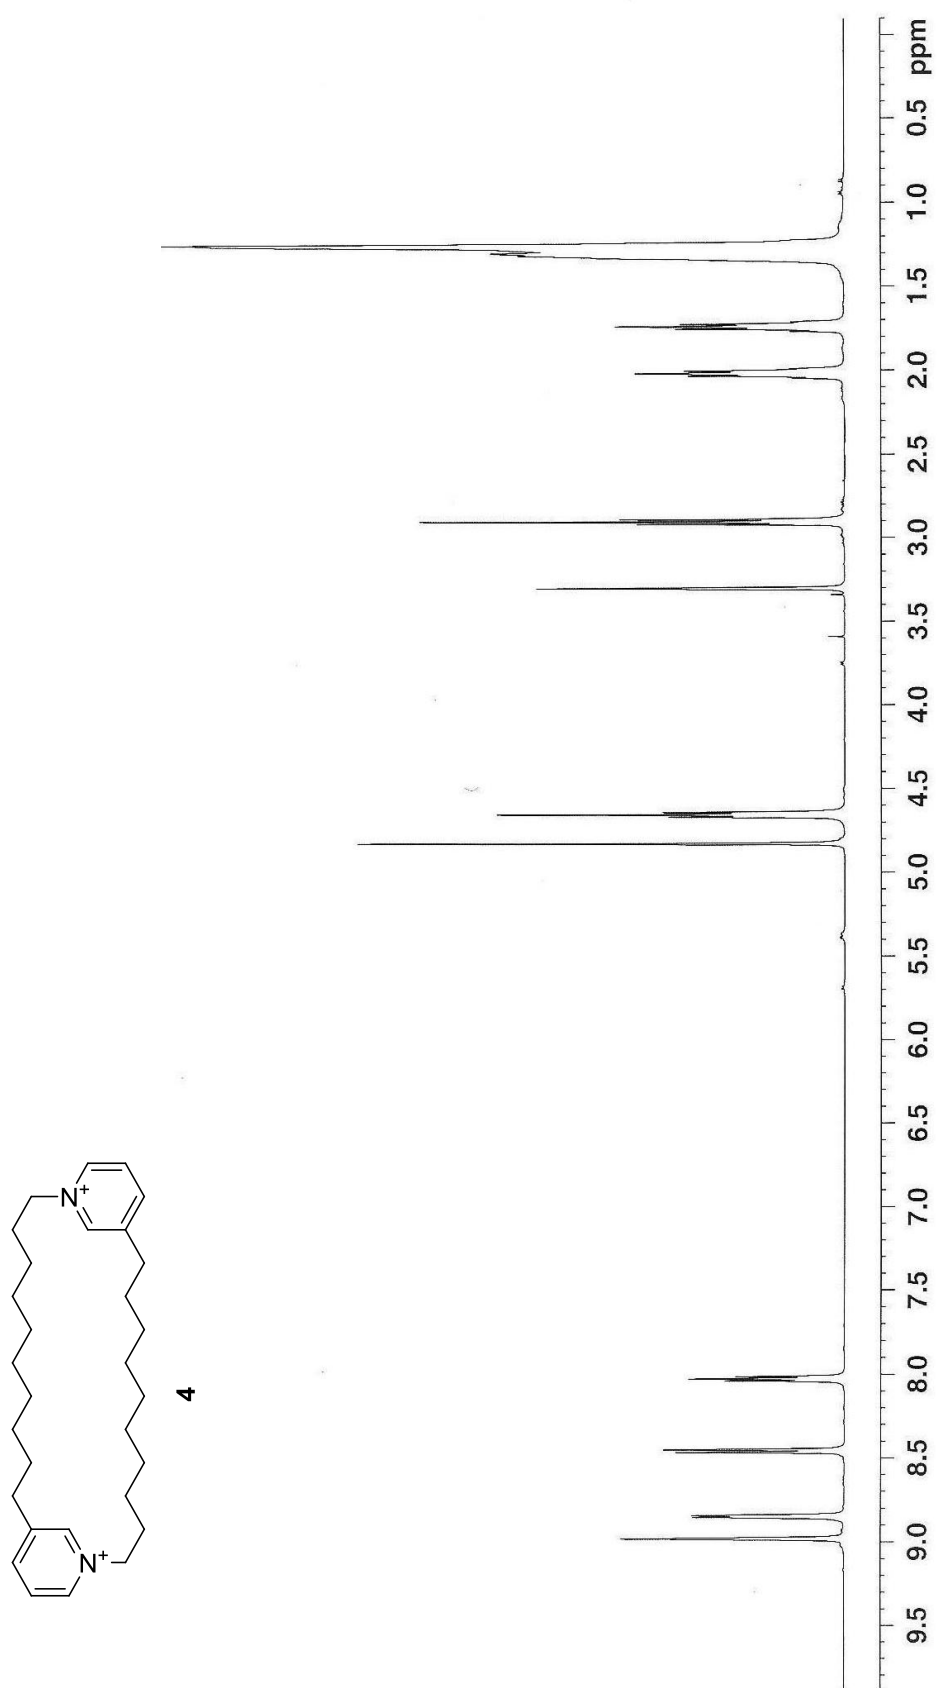

**Figure S4.** The  $^{13}\text{C}$  NMR (125 MHz,  $\text{MeOH-}d_4$ ) spectrum of Compound 4.

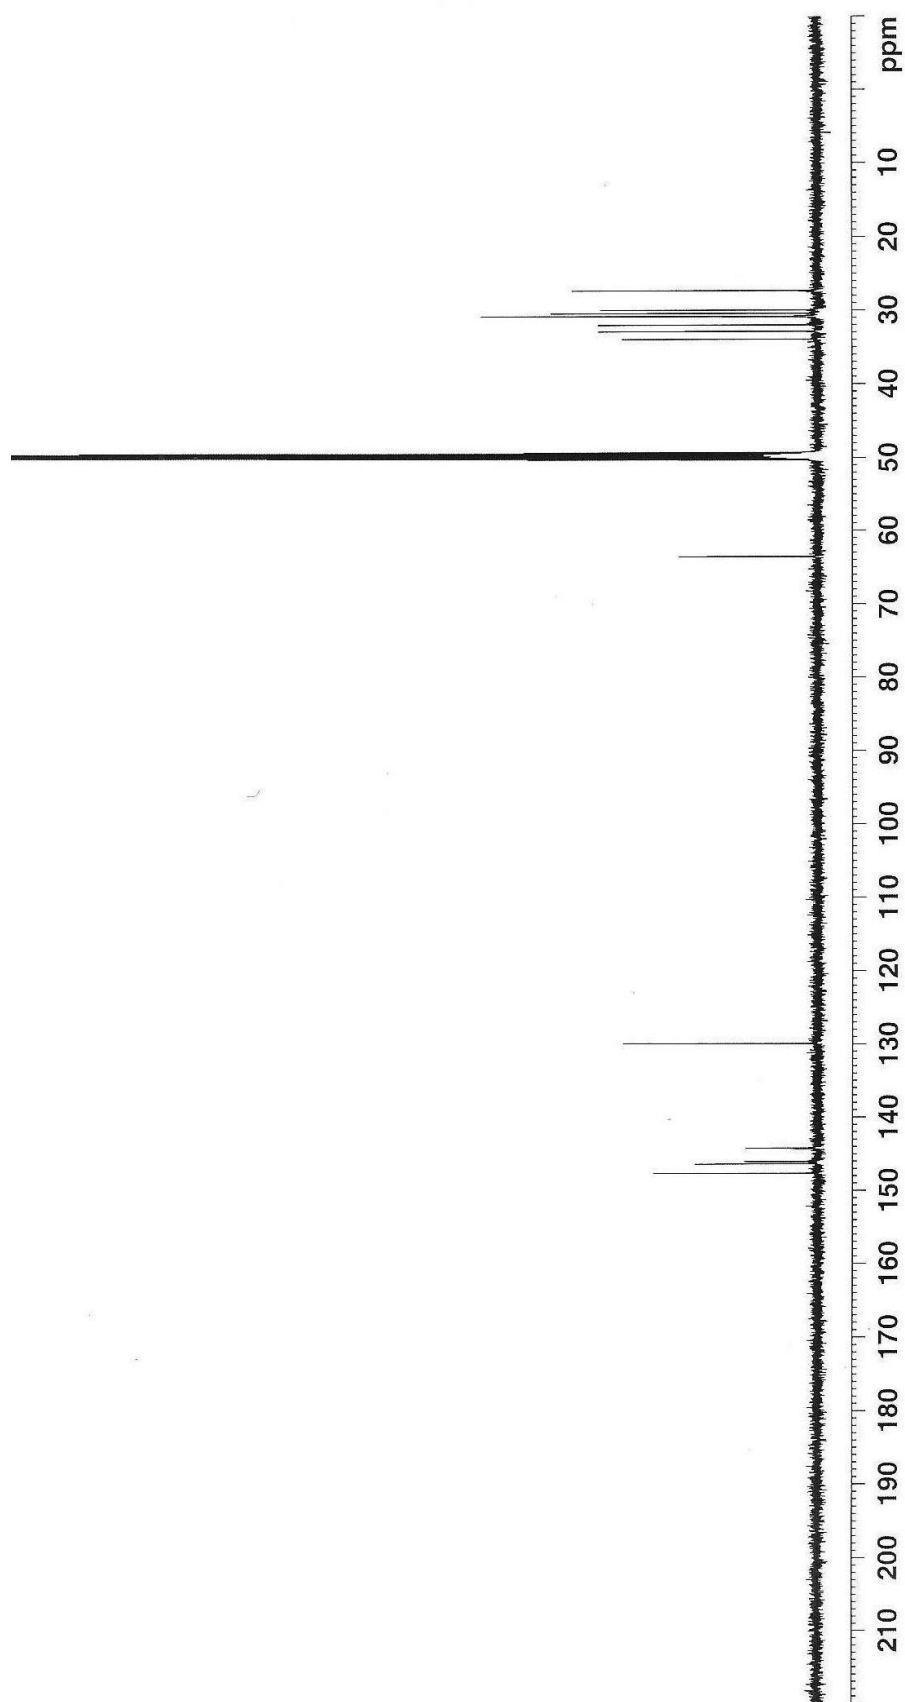

**Figure S5.** The  $^1\text{H}$  NMR (500 MHz,  $\text{MeOH-}d_4$ ) spectrum of Compound 5.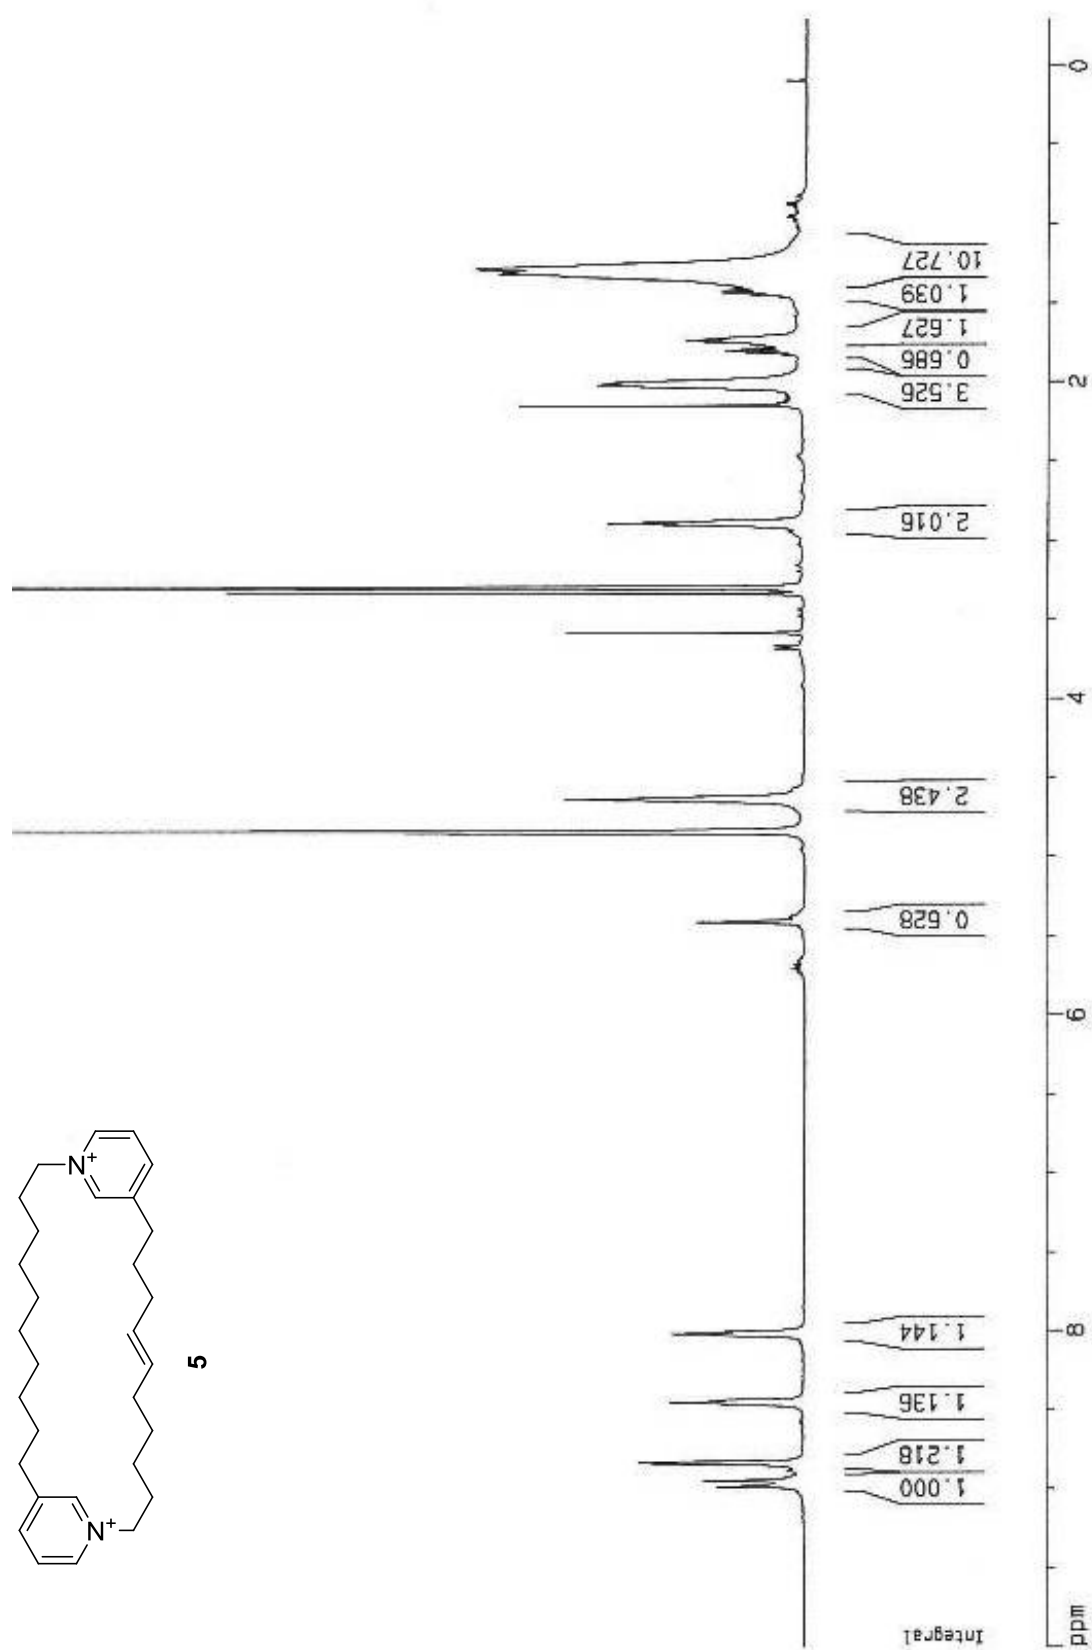

**Figure S6.** The  $^{13}\text{C}$  NMR (125 MHz,  $\text{MeOH-}d_4$ ) spectrum of Compound 5.

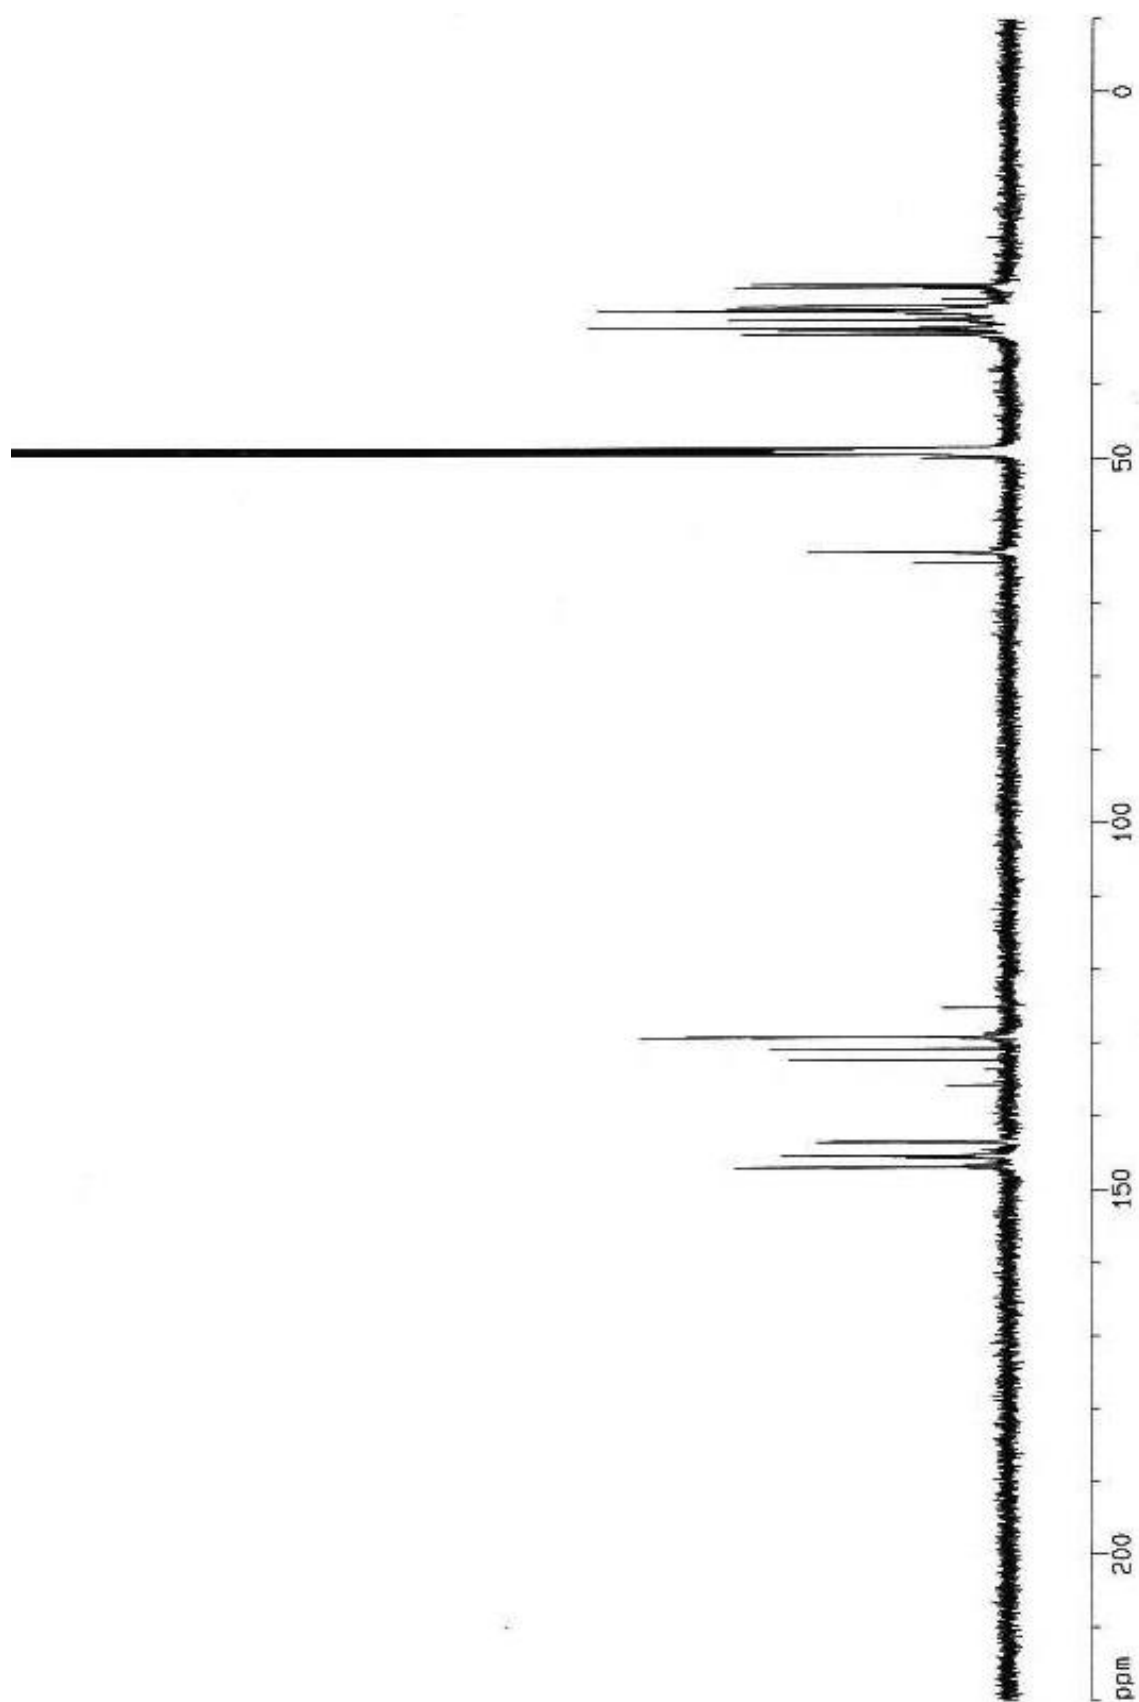

**Figure S7.** The  $^1\text{H}$  NMR (500 MHz,  $\text{MeOH-}d_4$ ) spectrum of Compound 6.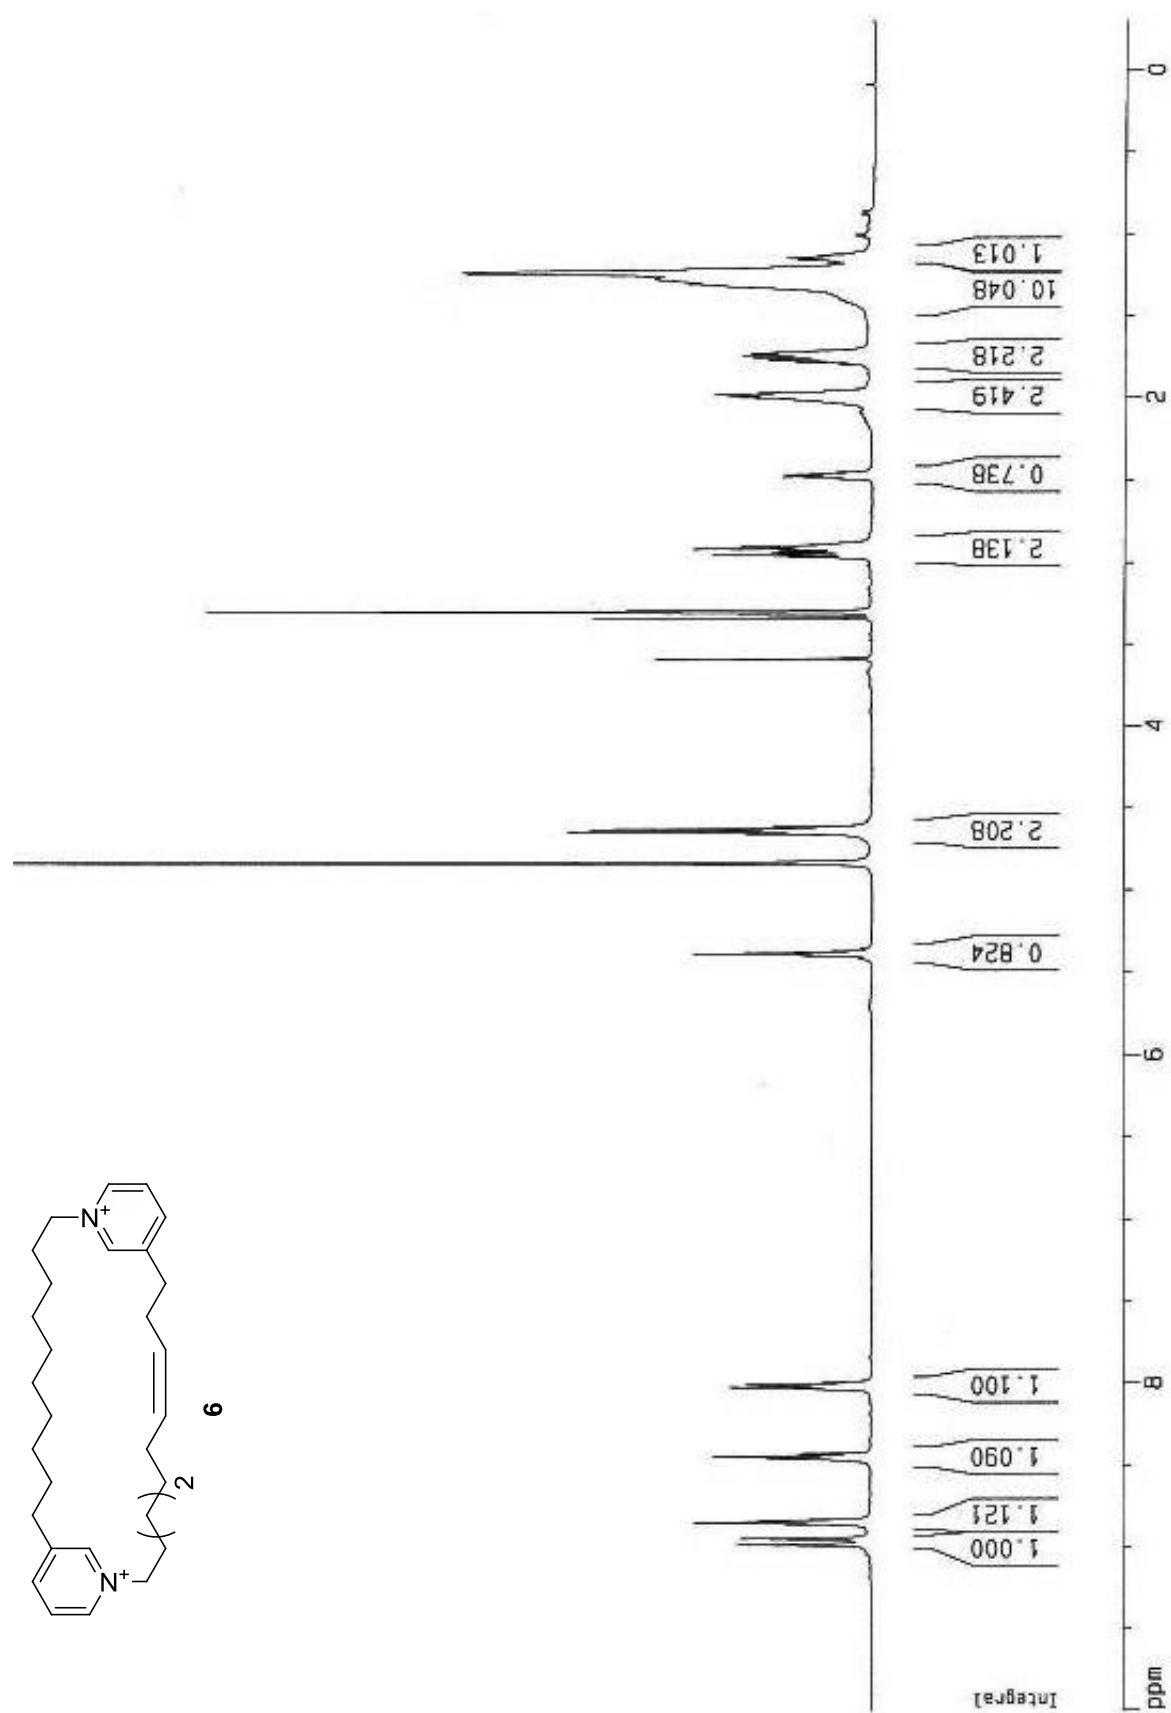

**Figure S8.** The  $^{13}\text{C}$  NMR (125 MHz,  $\text{MeOH-}d_4$ ) spectrum of Compound 6.

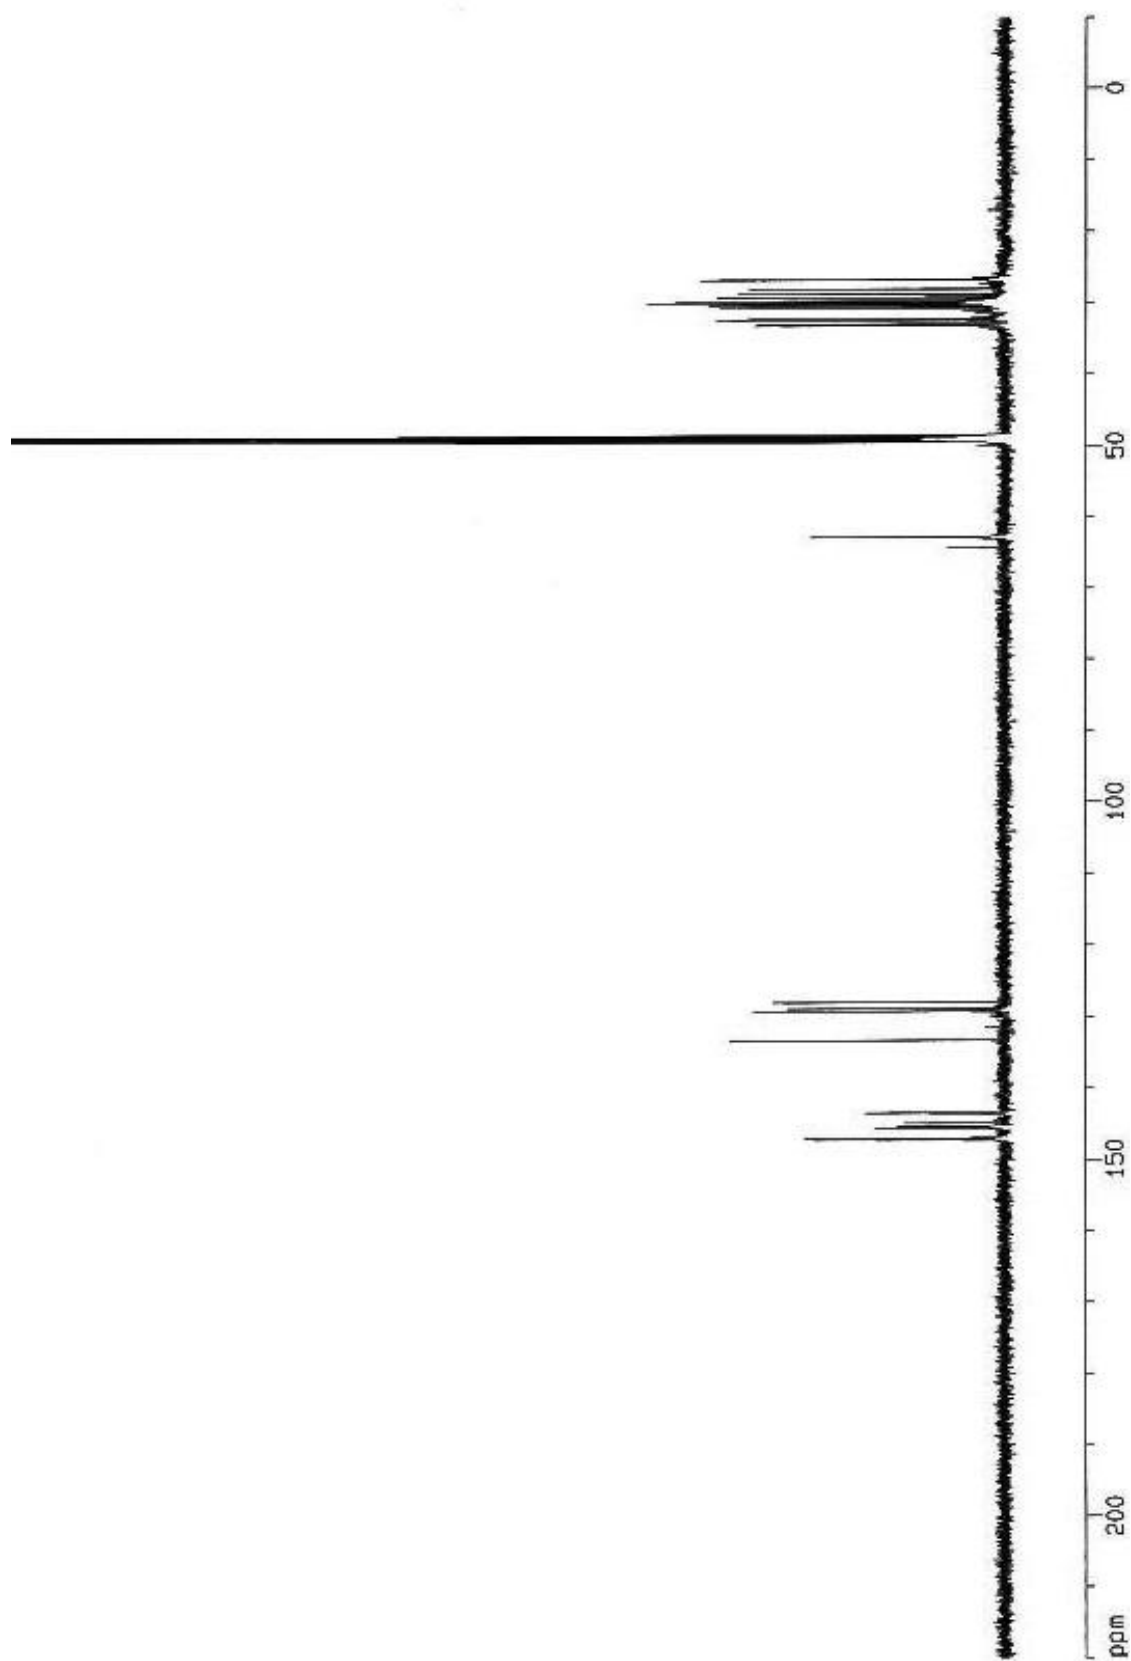

[illegible]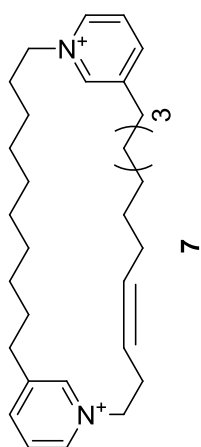

**Figure S10.** The  $^{13}\text{C}$  NMR (125 MHz,  $\text{MeOH-}d_4$ ) spectrum of Compound 7.

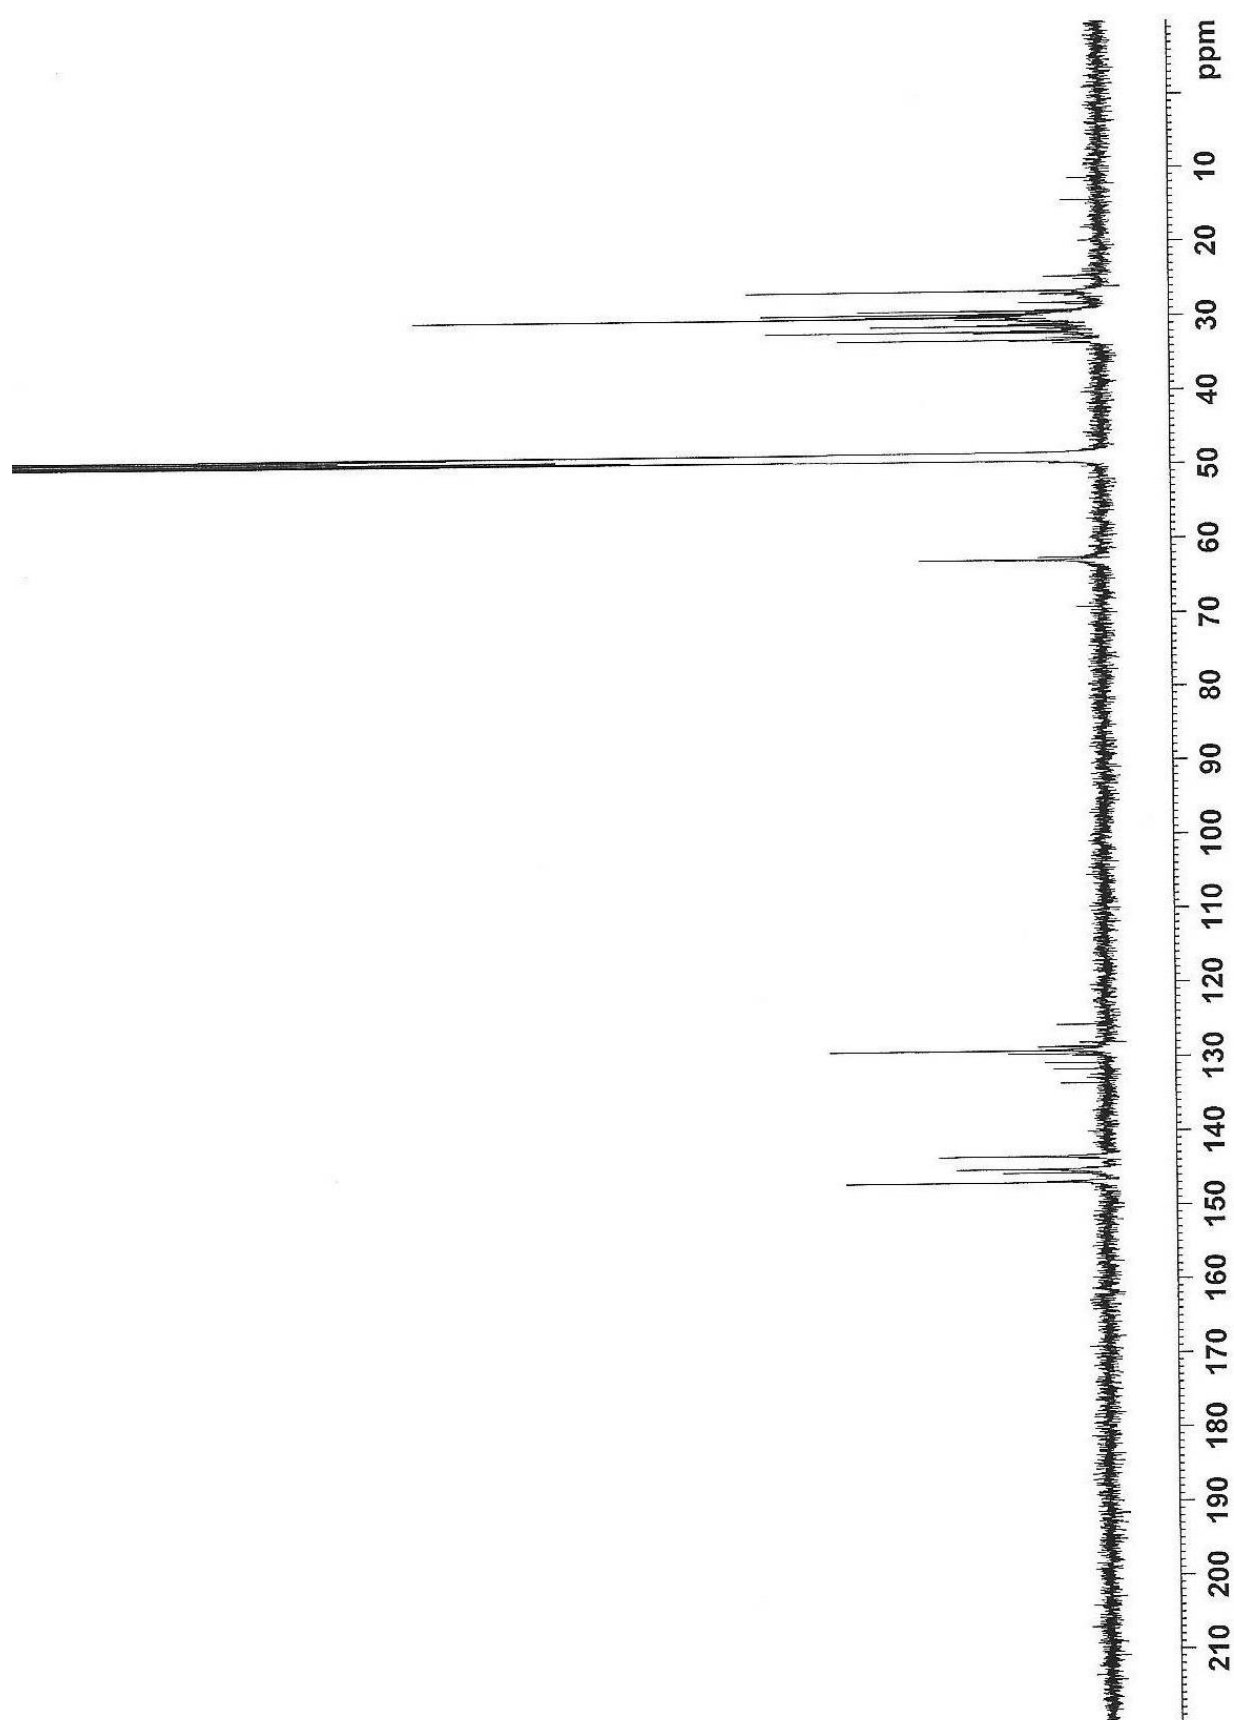

**Figure S11.** The  $^1\text{H}$  NMR (500 MHz,  $\text{MeOH-}d_4$ ) spectrum of Compound **8**.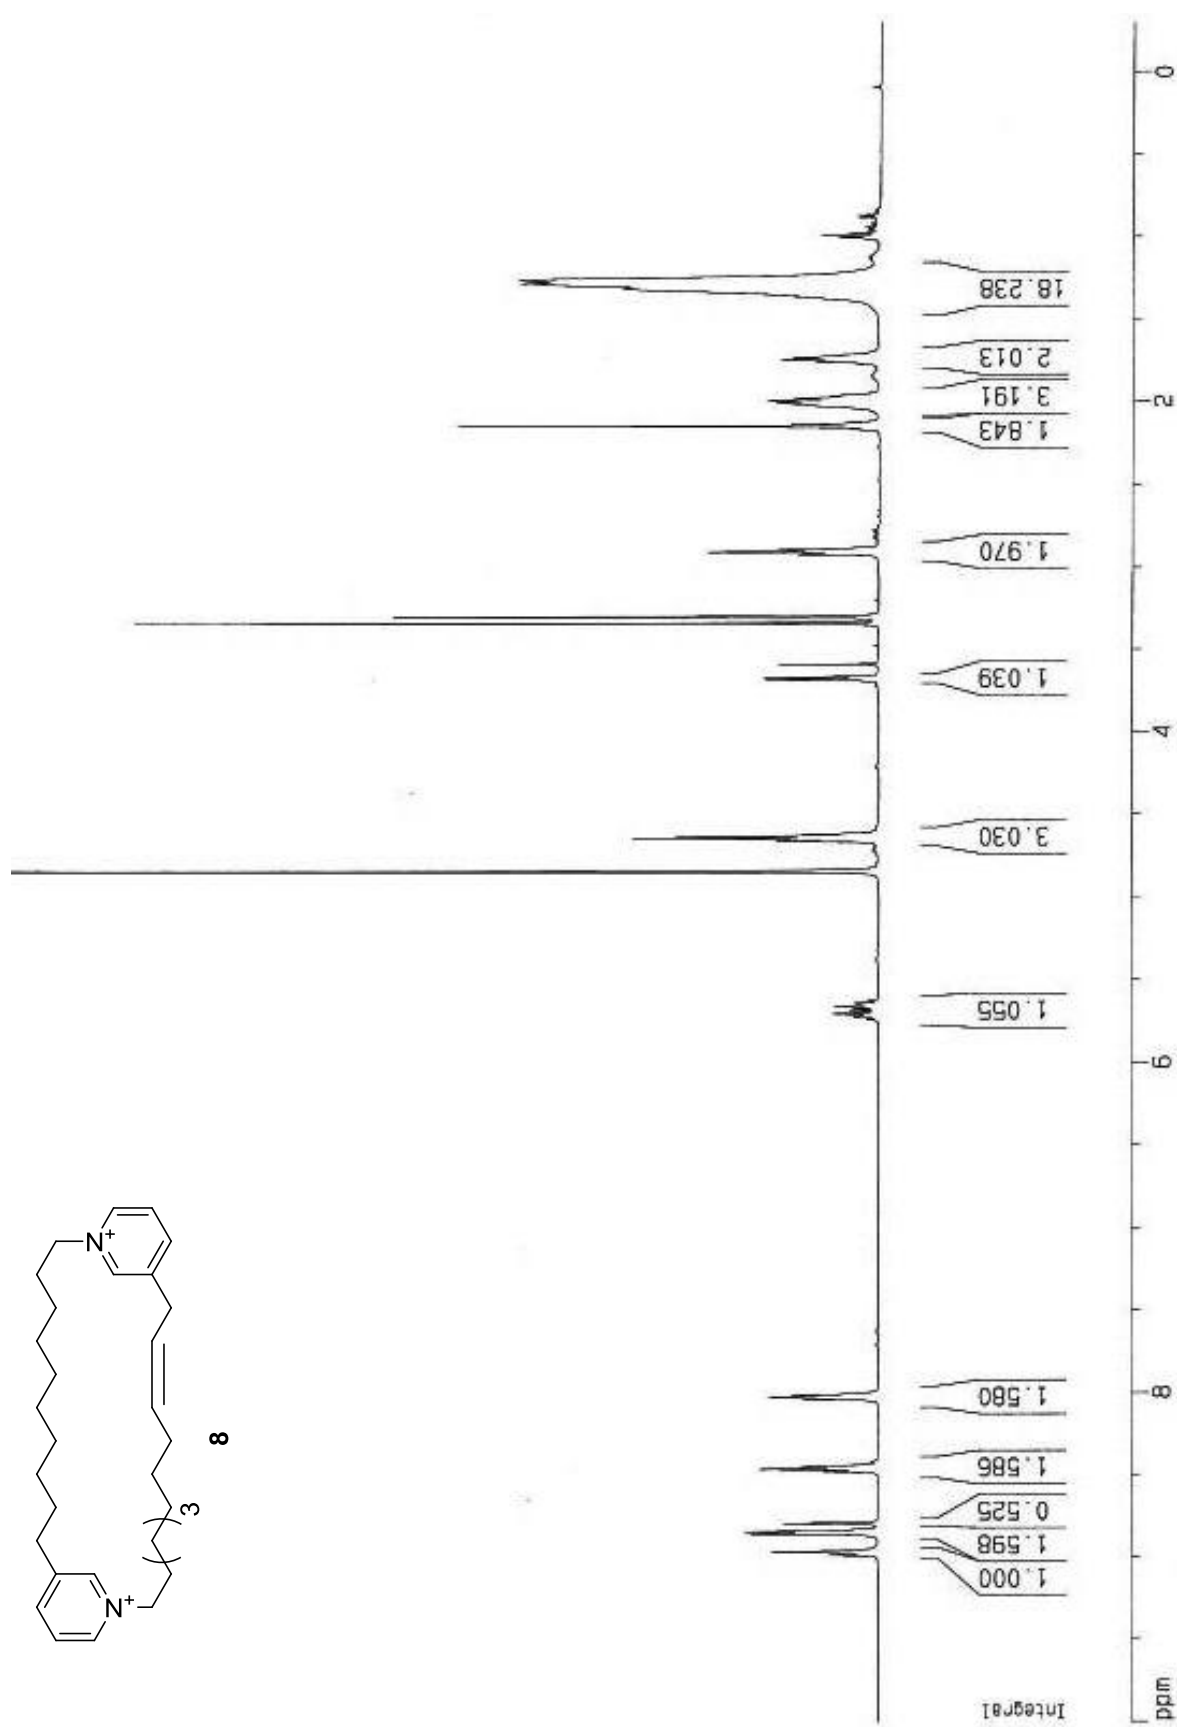

**Figure S12.** The  $^{13}\text{C}$  NMR (125 MHz,  $\text{MeOH-}d_4$ ) spectrum of Compound 8.

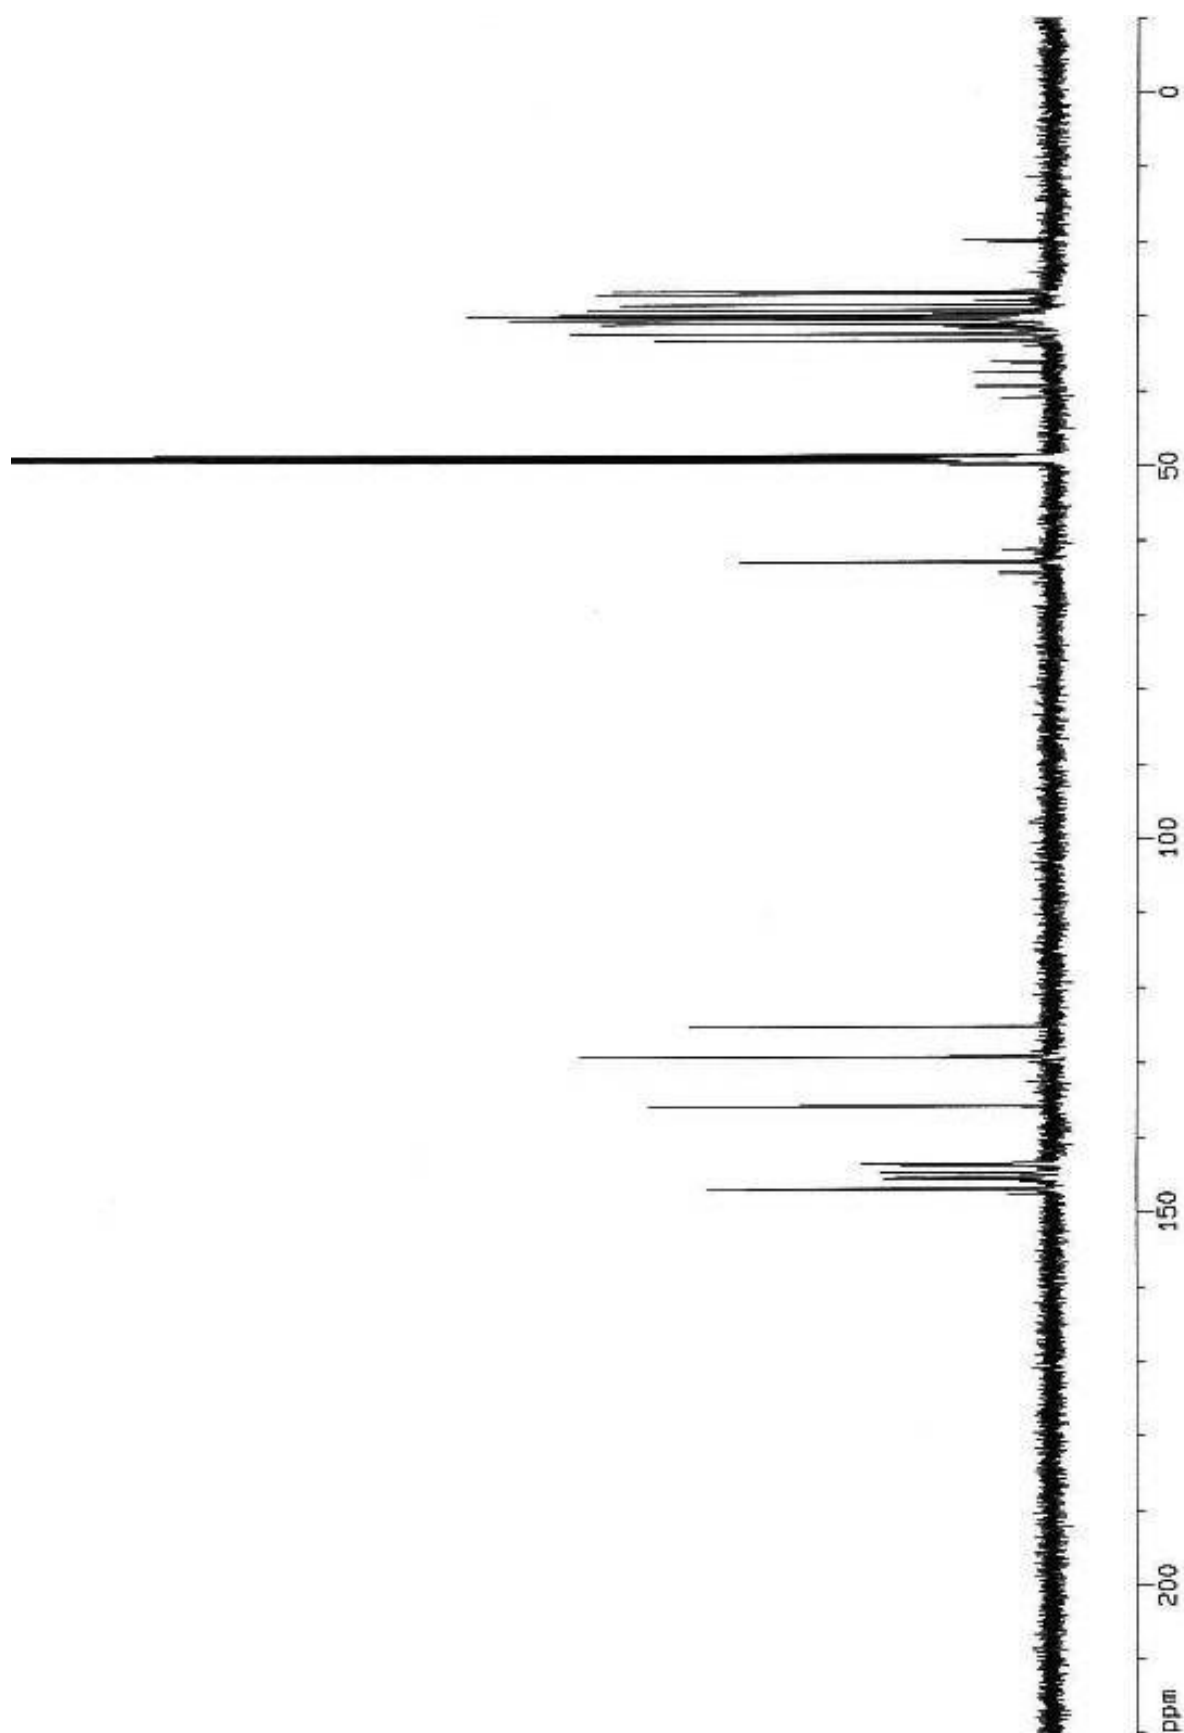

**Figure S13.** The  $^1\text{H}$  NMR (500 MHz,  $\text{MeOH-}d_4$ ) spectrum of Compound **9**.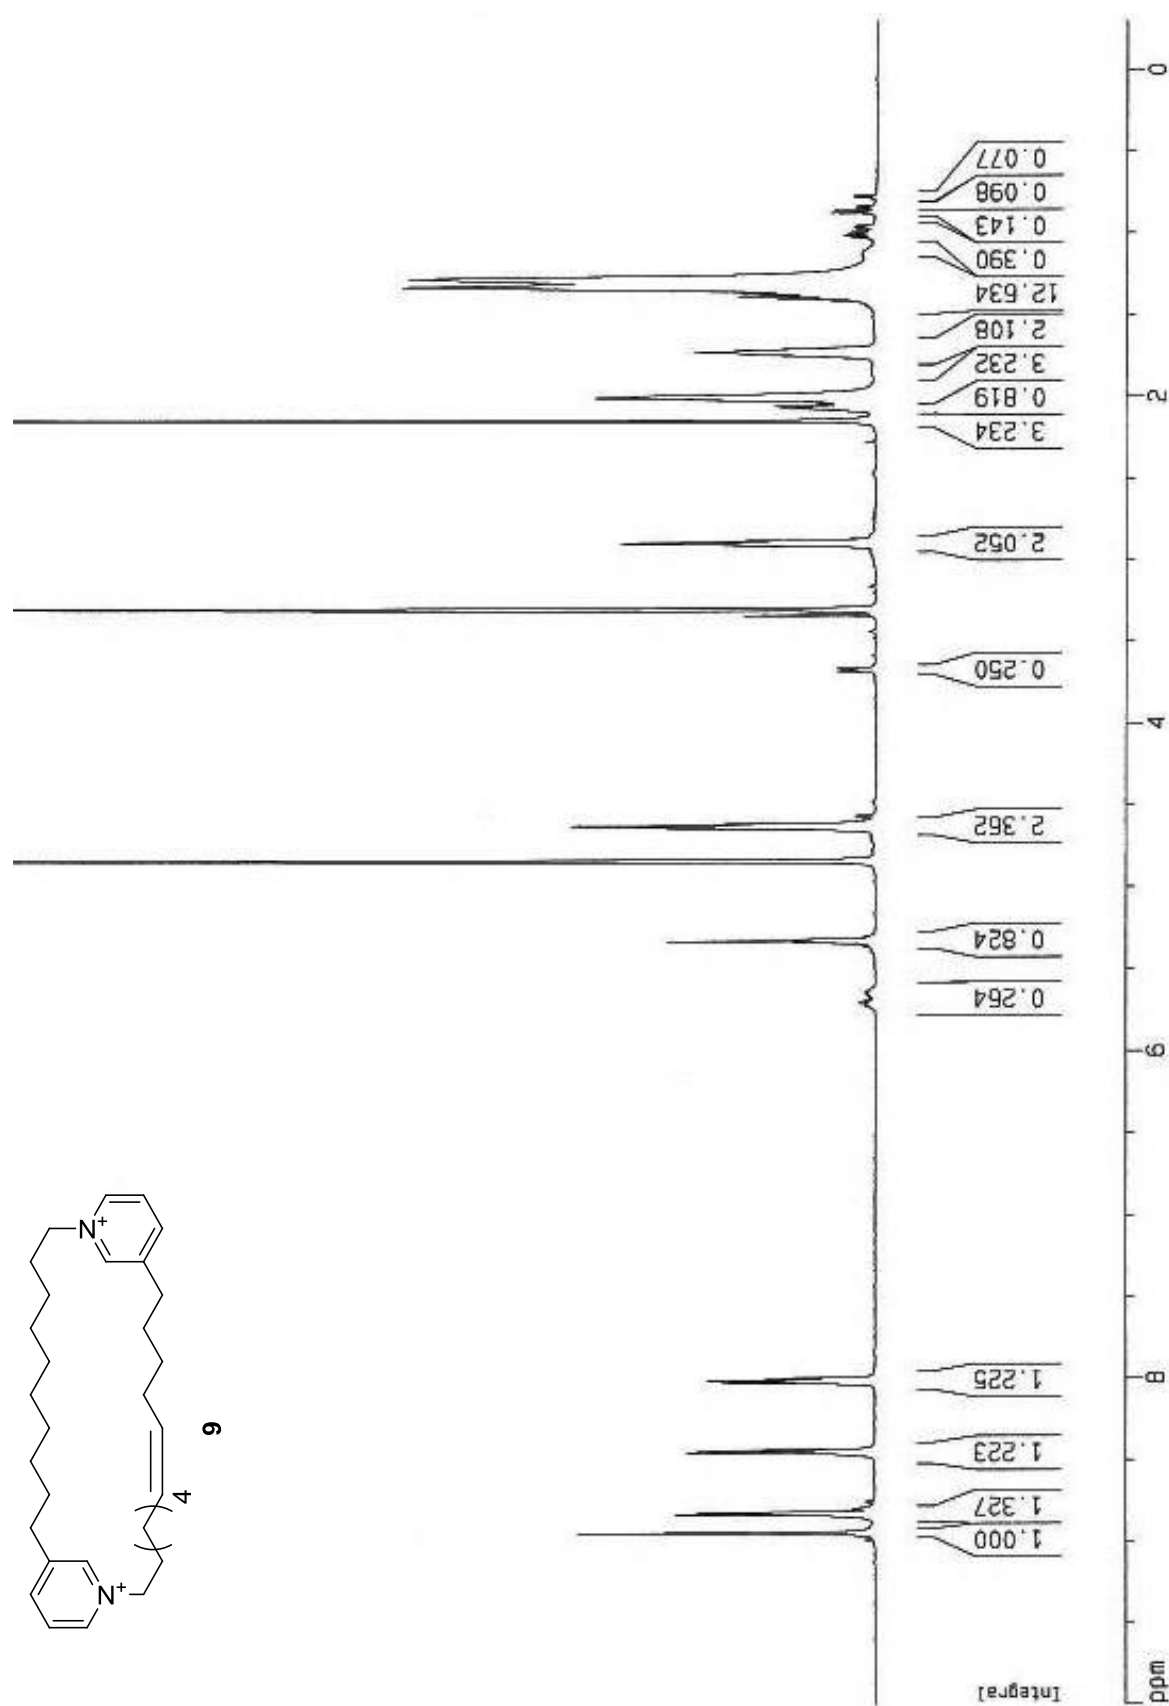

**Figure S14.** The  $^{13}\text{C}$  NMR (125 MHz,  $\text{MeOH-}d_4$ ) spectrum of Compound 9.

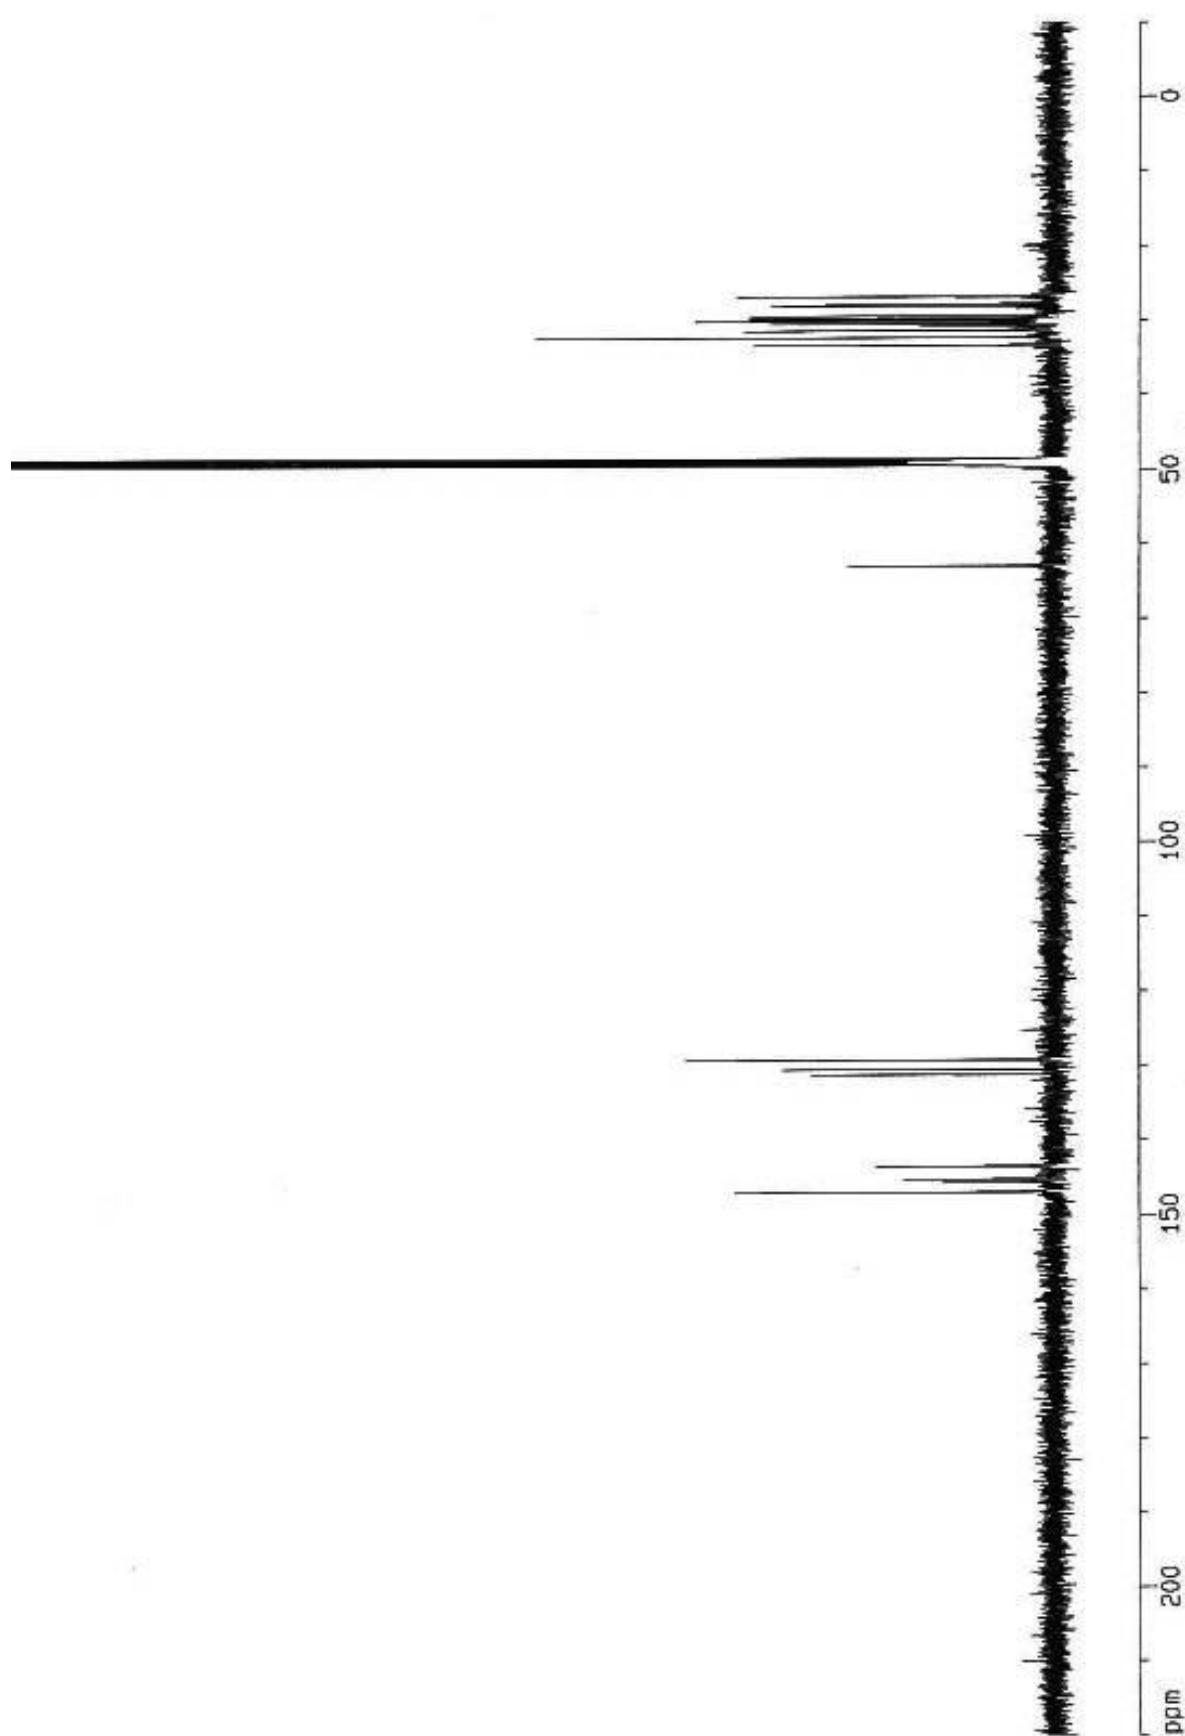

**Figure S15.** The  $^1\text{H}$  NMR (500 MHz,  $\text{MeOH-}d_4$ ) spectrum of Compound **10**.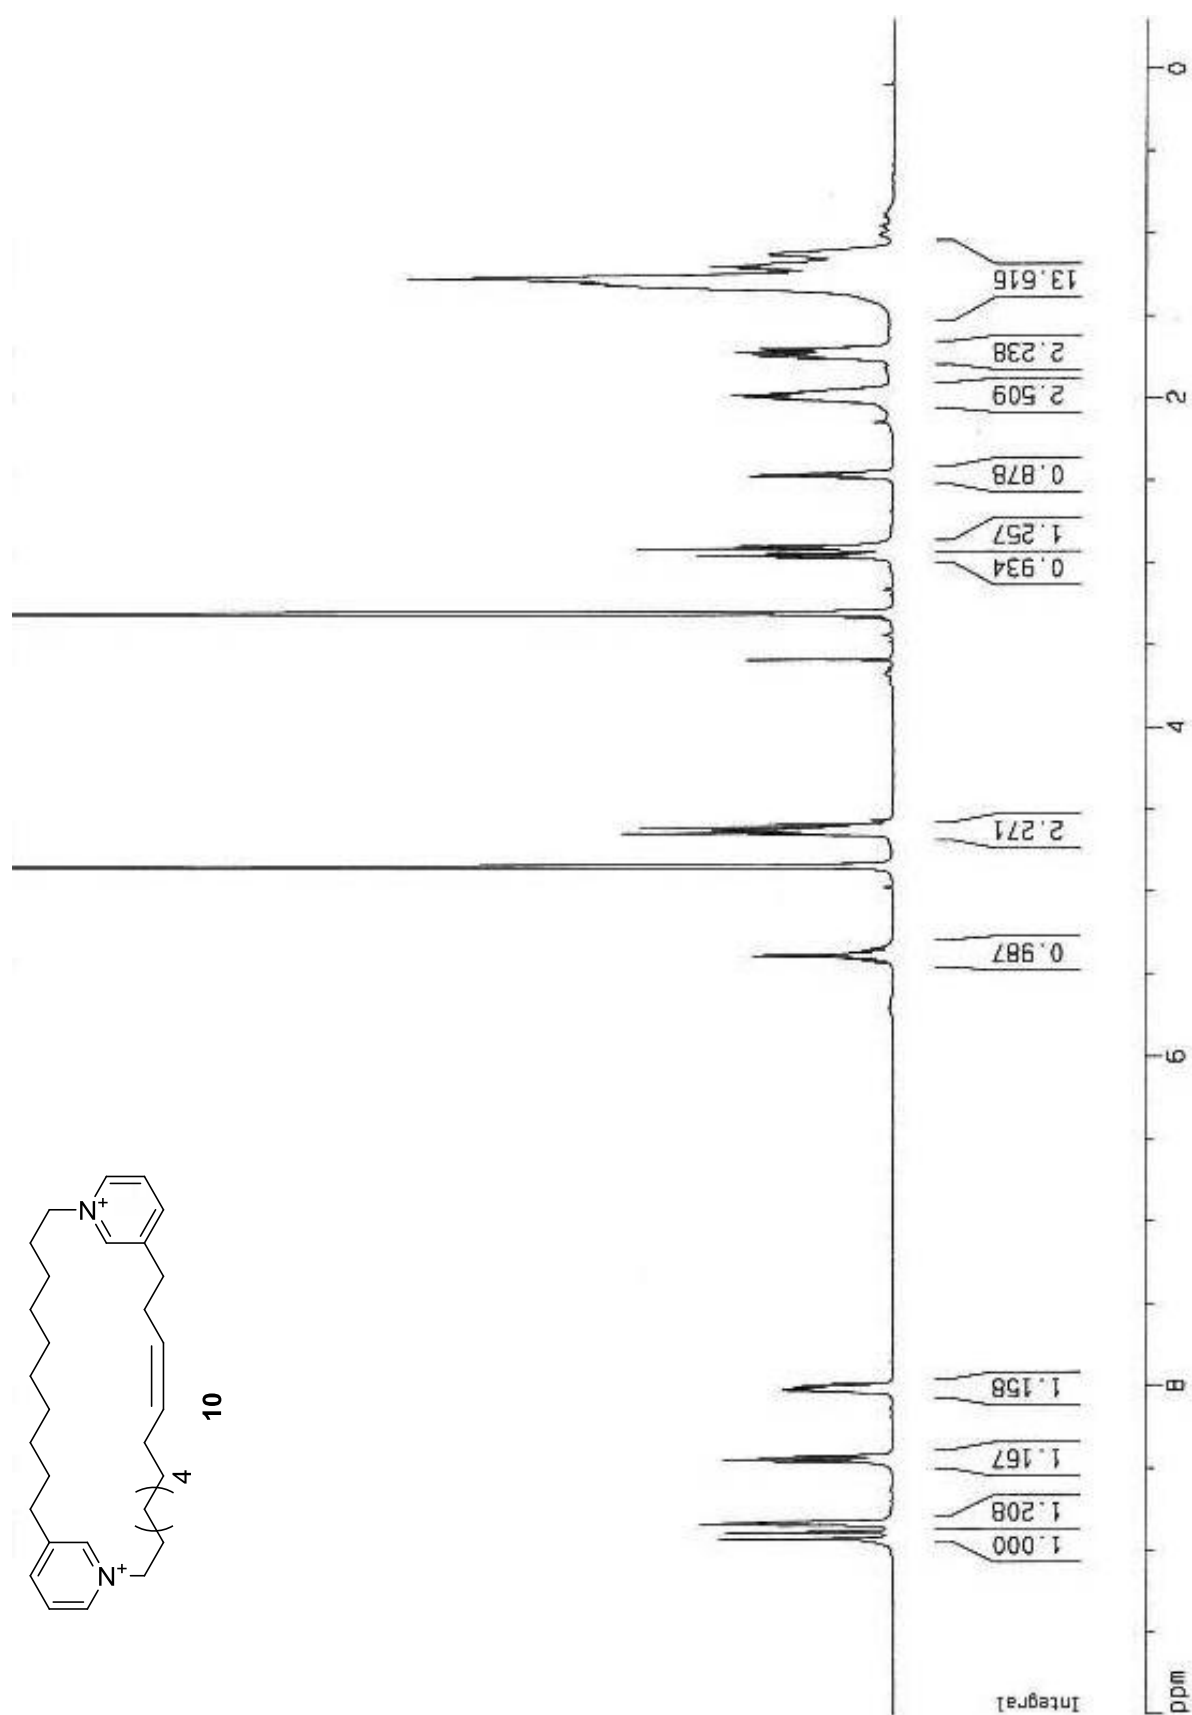

**Figure S16.** The  $^{13}\text{C}$  NMR (125 MHz,  $\text{MeOH-}d_4$ ) spectrum of Compound 10.

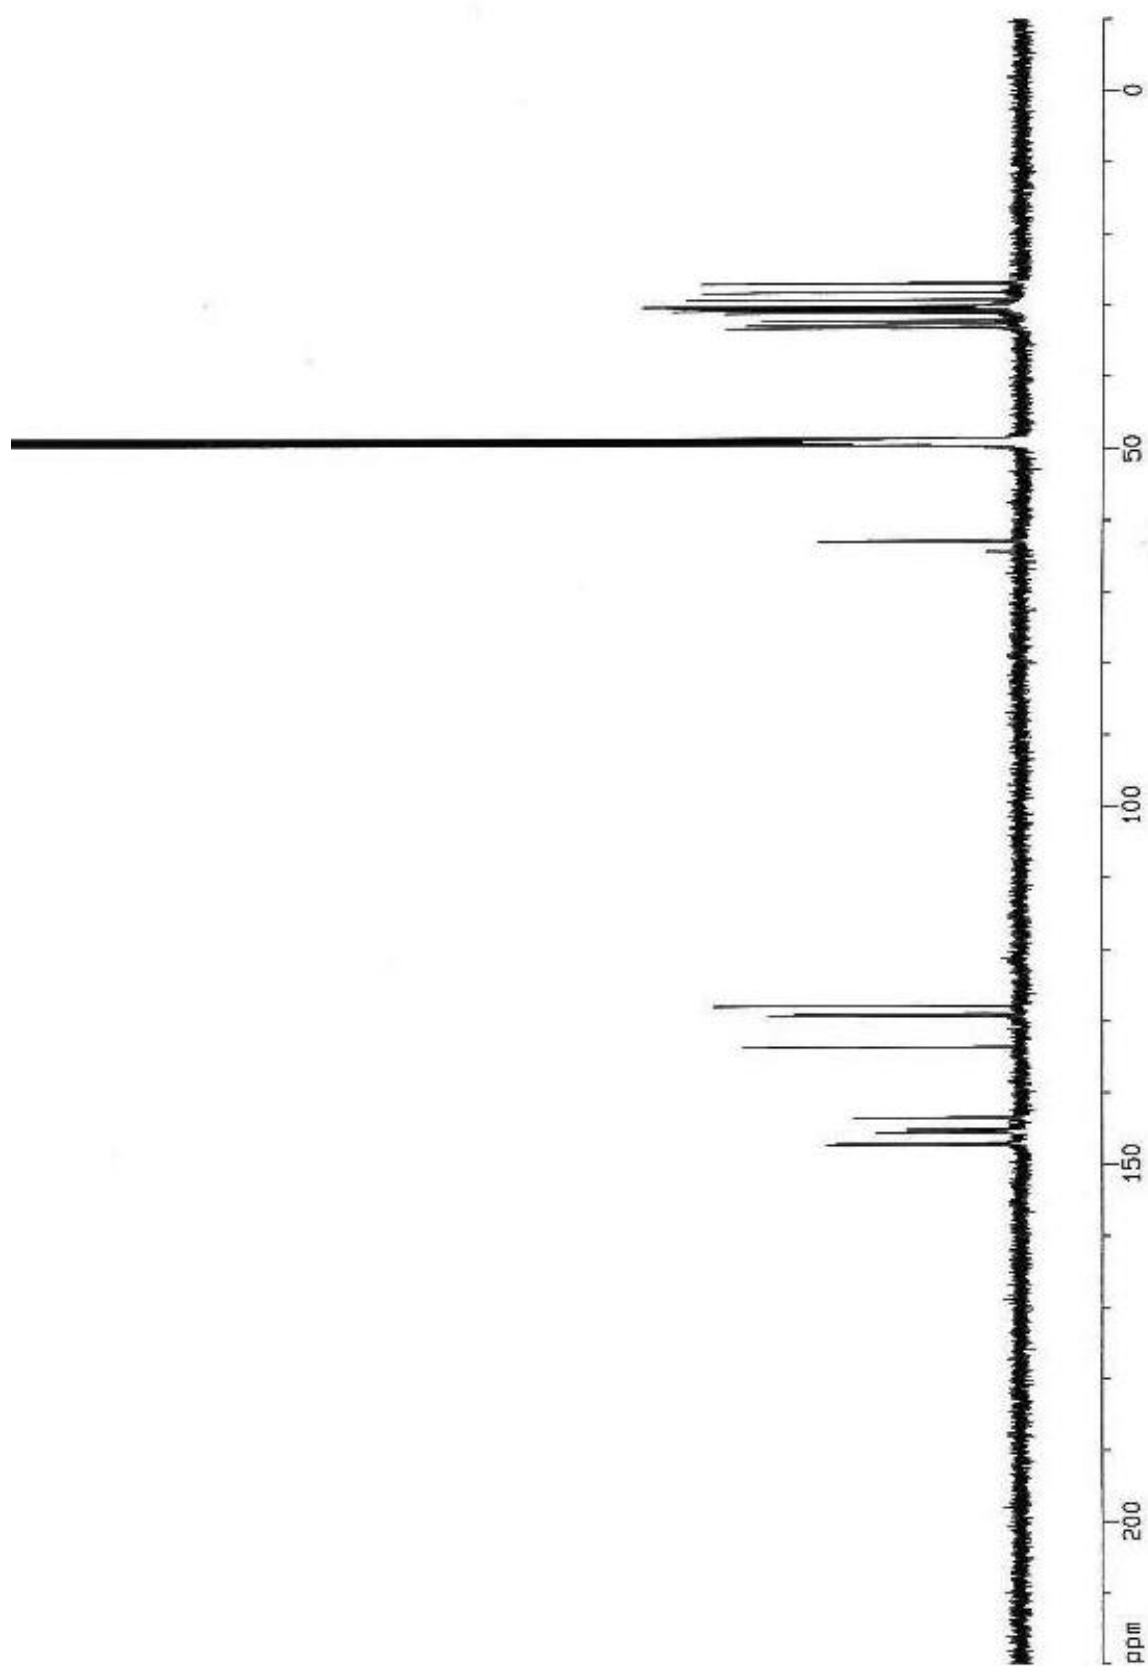

**Figure S17.** The cytotoxicity test results.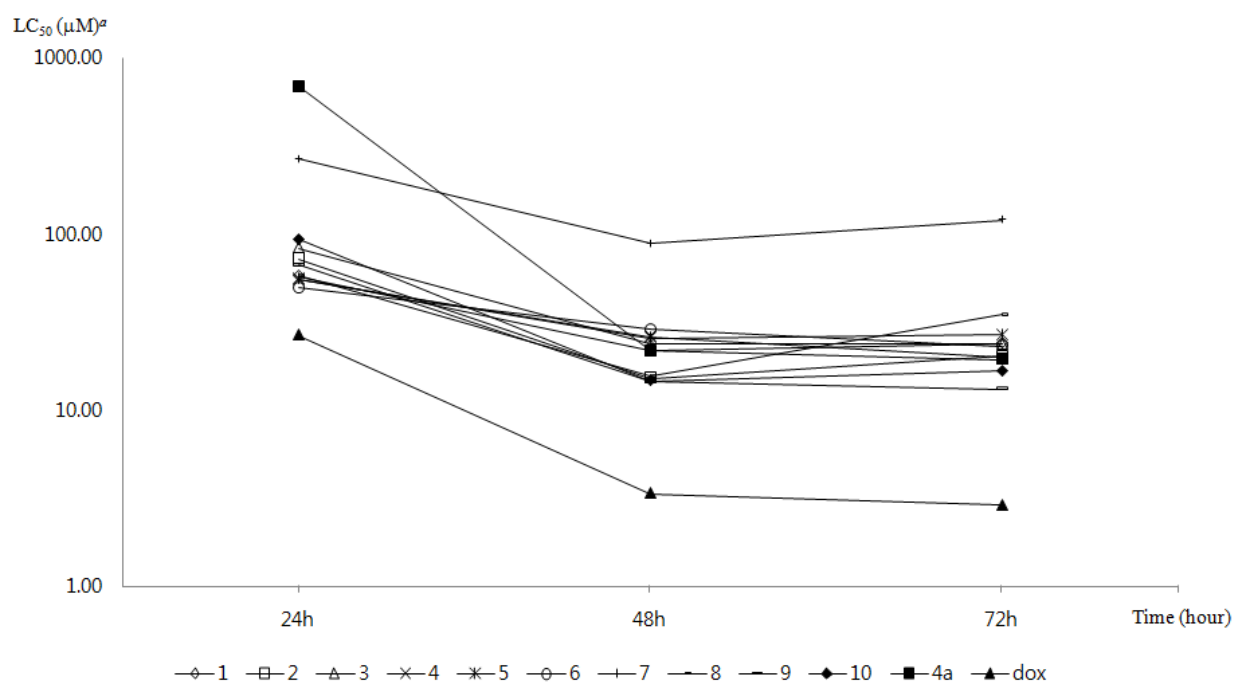

<sup>a</sup> Y axis is presented as log scale.

| compd | time | LC <sub>50</sub> (μm) |       |        |
|-------|------|-----------------------|-------|--------|
|       |      | 24h                   | 48h   | 72h    |
| 1     |      | 57.82                 | 22.10 | 24.15  |
| 2     |      | 73.00                 | 15.30 | 20.42  |
| 3     |      | 83.60                 | 24.00 | 24.00  |
| 4     |      | 55.37                 | 26.30 | 19.95  |
| 5     |      | 55.99                 | 25.90 | 27.00  |
| 6     |      | 49.98                 | 28.90 | 23.25  |
| 7     |      | 267.72                | 89.40 | 121.00 |
| 8     |      | 58.17                 | 15.70 | 35.31  |
| 9     |      | 67.21                 | 14.70 | 13.31  |
| 10    |      | 94.26                 | 14.80 | 16.80  |
| 4a    |      | 696.35                | 21.90 | 19.47  |
| dox   |      | 26.85                 | 3.37  | 2.91   |
